# Supplementary material for: MITF regulates the subcellular location of HIF1α through SUMOylation to promote the invasion and metastasis of daughter cells derived from polyploid giant cancer cells
Source: PubMed Central journal article supplement — Oncol Rep. 2024 Mar 6;51(5):63. doi: 10.3892/or.2024.8722 (PMC10940875; doi:10.3892/or.2024.8722), 2024-03-06

Figure S1. (A) Expression of total PIAS4, and MITF in Hct116 and LoVo PDCs transfected with siRNA PIAS4-315, 493, NC, and MC, respectively. (B) Expression of cytoplasmic PIAS4, and MITF in Hct116 and LoVo PDCs transfected with siRNA PIAS4-315, 493, NC, and MC, respectively. (C) Expression of nuclear PIAS4, and MITF in Hct116 and LoVo PDCs transfected with siRNA PIAS4-315, 493, NC, and MC, respectively. PIAS4, protein inhibitor of activated STAT protein 4; MITF, microphthalmia-associated transcription factor; PDCs, daughter cells; si, short interfering; NC, negative control; MC, mock control; PGCCs, polyploid giant cells; Tre, PGCCs with PDCs.

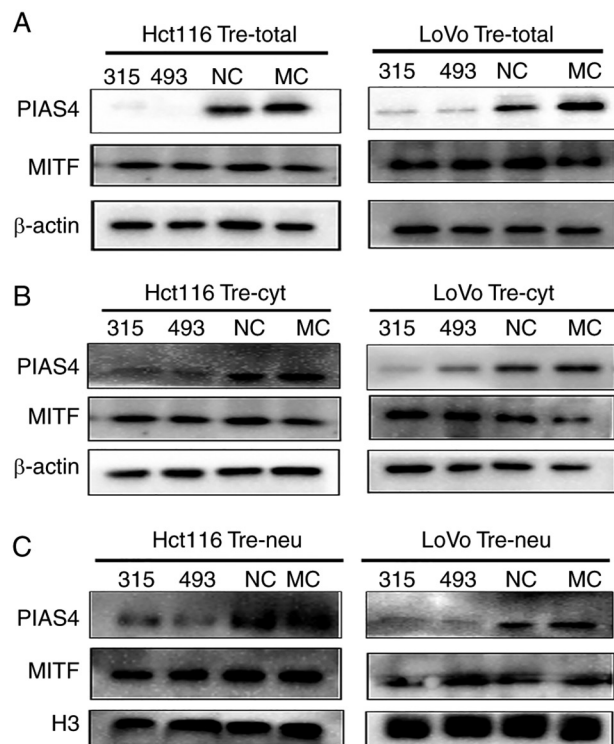

Supplement: Supplementary_Data.pdf [file Supplementary_Data.pdf]
